# Supplementary material for: Association between Dietary Diversity Score and Metabolic Syndrome in Korean Adults: A Community-Based Prospective Cohort Study
Source: MDPI journal article supplement (doi:10.3390/nu14245298), 2022-12-13
Supplement: s1 [file s1]

**Supplementary Table S1.** Classification of food items.

| 5 Major food groups         |                                   | Food items                                                                                                                                                                                                                                                             |
|-----------------------------|-----------------------------------|------------------------------------------------------------------------------------------------------------------------------------------------------------------------------------------------------------------------------------------------------------------------|
| Grains                      | Staple foods made from grains     | white rice, white rice cake/rice-cake soup, steamed white rice cake/injeolmi, wheat noodles, jajangmyeon, naengmyeon/buckwheat noodles, powder of roast grain, dumplings, bread, red bean bread/steamed bun, other bread, corn flakes, snacks, muk, cellophane noodles |
|                             | Whole grains                      | rice with barley, rice with other cereals                                                                                                                                                                                                                              |
|                             | White roots/tubers                | potato, sweet potato                                                                                                                                                                                                                                                   |
|                             | Instant noodles                   | ramyon                                                                                                                                                                                                                                                                 |
|                             | Fast food                         | pizza/hamburger                                                                                                                                                                                                                                                        |
| Meat, fish, eggs, and beans | Processed meat                    | ham/sausages                                                                                                                                                                                                                                                           |
|                             | Processed red meat (ruminant)     | roasted beef, beef stew, galbijjim, dog meat, organs from animals                                                                                                                                                                                                      |
|                             | Processed red meat (non-ruminant) | grilled pork belly, roasted pork, steamed pork                                                                                                                                                                                                                         |
|                             | Poultry                           | chicken                                                                                                                                                                                                                                                                |
|                             | Fish & seafood                    | sashimi, hairtail, ell, croaker, pollack, frozen pollack, dried pollack, blue-backed fish, anchovy, squid, small octopus, canned tuna, fish cake/crab meat, crab, clam, oyster, shrimp, salted seafood                                                                 |
|                             | Eggs                              | Eggs, quail eggs                                                                                                                                                                                                                                                       |
|                             | Legumes                           | beans/beans cooked in soy sauce, bean paste soup, tofu, soybean milk                                                                                                                                                                                                   |
| Vegetables                  | Nuts & seeds                      | peanuts/almonds/pine nut                                                                                                                                                                                                                                               |
|                             | Vitamin A-rich orange vegetables  | carrot/carrot juice, pumpkin, zucchini                                                                                                                                                                                                                                 |
|                             | Dark green leafy vegetables       | pepper leaves, sesame leaf, spinach, chives/water celery, other green vegetables                                                                                                                                                                                       |

|        |                       |                                                                                                                                                                                                                                                                                            |
|--------|-----------------------|--------------------------------------------------------------------------------------------------------------------------------------------------------------------------------------------------------------------------------------------------------------------------------------------|
|        |                       |                                                                                                                                                                                                                                                                                            |
|        | Other vegetables      | cabbage, cabbage kimchi, sweet potato vines, bean sprouts, deodeok/balloon flower, radish, radish kimchi, radish water kimchi, other kimchi, pickled vegetables<br>onion, pepper, lettuce, mushroom, other mushrooms, cucumber, seaweed, tomato/tomato juice, vegetable juice, green juice |
| Fruits | Vitamin A-rich fruits | persimmon                                                                                                                                                                                                                                                                                  |
|        | Citrus                | orange/orange juice, tangerine                                                                                                                                                                                                                                                             |
|        | Other fruits          | strawberry, oriental melon/watermelon, banana, pear, peach/plum, apple/apple juice, grape/grape juice                                                                                                                                                                                      |
|        | Fruit juice           | orange/orange juice, apple/apple juice, grape/grape juice                                                                                                                                                                                                                                  |
| Milk   | Cheese                | cheese                                                                                                                                                                                                                                                                                     |
|        | Yogurt                | yogurt                                                                                                                                                                                                                                                                                     |
|        | Fluid milk            | milk                                                                                                                                                                                                                                                                                       |

**Supplementary Table S2.** Changes in body weight and metabolic syndrome components during follow-up among men.

|                                  | Men          |              |         |              |              |         |              |              |         |
|----------------------------------|--------------|--------------|---------|--------------|--------------|---------|--------------|--------------|---------|
|                                  | ≤3           |              | P-value | 4            |              | P-value | 5            |              | P-value |
|                                  | (n = 524)    |              |         | (n = 1,156)  |              |         | (n = 1,144)  |              |         |
|                                  | At baseline  | At follow-up |         | At baseline  | At follow-up |         | At baseline  | At follow-up |         |
| Weight (kg)                      | 64.5 ± 0.39  | 65.5 ± 0.52  | 0.8263  | 64.5 ± 0.26  | 64.7 ± 0.35  | 0.0121  | 66.0 ± 0.26  | 66.6 ± 0.35  | 0.5193  |
| Abdominal obesity (cm)           | 81.2 ± 0.29  | 86.2 ± 0.45  | <.0001  | 80.8 ± 0.19  | 84.8 ± 0.30  | <.0001  | 81.4 ± 0.20  | 85.3 ± 0.30  | <.0001  |
| Elevated blood pressure (mmHg)   |              |              |         |              |              |         |              |              |         |
| SBP                              | 119.5 ± 0.65 | 120.4 ± 0.84 | 0.3844  | 117.9 ± 0.44 | 119.0 ± 0.56 | 0.0001  | 117.0 ± 0.44 | 118.7 ± 0.55 | 0.0012  |
| DBP                              | 80.3 ± 0.44  | 77.7 ± 0.55  | 0.0001  | 79.4 ± 0.30  | 76.9 ± 0.37  | 0.0008  | 78.9 ± 0.29  | 77.6 ± 0.36  | 0.0002  |
| Hypertriglyceridemia (mg/dL)     | 157.6 ± 4.18 | 139.2 ± 5.68 | 0.0053  | 150.9 ± 2.82 | 135.5 ± 3.83 | 0.0002  | 145.8 ± 2.83 | 136.0 ± 3.77 | 0.0056  |
| Elevated fasting glucose (mg/dL) | 84.7 ± 0.58  | 94.4 ± 0.87  | <.0001  | 84.9 ± 0.39  | 95.4 ± 0.58  | <.0001  | 85.7 ± 0.39  | 94.5 ± 0.57  | <.0001  |
| Reduced HDL cholesterol (mg/dL)  | 45.7 ± 0.43  | 45.7 ± 0.67  | 0.8287  | 45.5 ± 0.29  | 45.0 ± 0.45  | 0.9641  | 45.6 ± 0.29  | 46.0 ± 0.44  | 0.0458  |

**Supplementary Table S3.** Changes in body weight and metabolic syndrome components during follow-up among women.

| Women           |         |                |         |                  |         |
|-----------------|---------|----------------|---------|------------------|---------|
| ≤3<br>(n = 297) | P-value | 4<br>(n = 925) | P-value | 5<br>(n = 1,422) | P-value |

|                                  | At baseline  | At follow-up |        | At baseline  | At follow-up |        | At baseline  | At follow-up |        |
|----------------------------------|--------------|--------------|--------|--------------|--------------|--------|--------------|--------------|--------|
| Weight (kg)                      | 56.0 ± 0.46  | 56.3 ± 0.60  | 0.1475 | 56.4 ± 0.26  | 56.1 ± 0.34  | 0.0273 | 57.2 ± 0.21  | 57.4 ± 0.27  | 0.1616 |
| Abdominal obesity (cm)           | 78.6 ± 0.48  | 84.7 ± 0.65  | <.0001 | 77.3 ± 0.27  | 82.0 ± 0.38  | <.0001 | 76.6 ± 0.21  | 81.6 ± 0.29  | <.0001 |
| Elevated blood pressure (mmHg)   |              |              |        |              |              |        |              |              |        |
| SBP                              | 113.9 ± 0.89 | 119.1 ± 1.20 | 0.0002 | 113.0 ± 0.50 | 115.3 ± 0.70 | <.0001 | 111.8 ± 0.41 | 115.7 ± 0.54 | <.0001 |
| DBP                              | 76.0 ± 0.58  | 74.8 ± 0.71  | 0.0600 | 74.5 ± 0.33  | 73.3 ± 0.41  | 0.5211 | 73.9 ± 0.27  | 73.9 ± 0.32  | 0.2731 |
| Hypertriglyceridemia (mg/dL)     | 114.0 ± 2.90 | 124.2 ± 5.02 | 0.0922 | 114.4 ± 1.64 | 118.0 ± 2.92 | 0.0979 | 112.7 ± 1.32 | 114.8 ± 2.27 | 0.3850 |
| Elevated fasting glucose (mg/dL) | 82.2 ± 0.60  | 92.9 ± 1.08  | <.0001 | 80.5 ± 0.34  | 90.2 ± 0.63  | <.0001 | 80.8 ± 0.27  | 90.8 ± 0.49  | <.0001 |
| Reduced HDL cholesterol (mg/dL)  | 48.3 ± 0.58  | 49.1 ± 0.86  | 0.6150 | 48.8 ± 0.33  | 50.4 ± 0.50  | <.0001 | 48.8 ± 0.26  | 50.6 ± 0.39  | <.0001 |
